# Supplementary material for: Intra- and Inter-Task Reliability of Spatial Attention Measures in Pseudoneglect
Source: PLoS One. 2015 Sep 17;10(9):e0138379. doi: 10.1371/journal.pone.0138379 (PMC4574708; doi:10.1371/journal.pone.0138379)
Supplement: S1 Data — Columns C-F: Alertness scores. Columns H-S: Spatial bias scores. Columns U-AD: Curve width values. Columns AF-AN: Mean spatial bias scores for each MLB stimulus position. (XLSX) [file pone.0138379.s001.xlsx]

## Sheet: S1 Data
SubjectID		alert_Pre1	alert_Post1	alert_Pre2	alert_Post2		MLB1_bias	MLB2_bias	LM1_bias	LM2_bias	GRE1_bias	GRE2_bias	GRA1_bias	GRA2_bias	LVD1_d'_bias	LVD2_d'_bias	LVD1_PF50_bias	LVD2_PF50_bias		LM_width1	LM_width2	GRE_width1	GRE_width2	GRA_width1	GRA_width2	LVD_Left1_width	LVD_Right1_width	LVD_Left2_width	LVD_Right2_width		MLB_left_160	MLB_left_120	MLB_left_80	MLB_left_40	MLB_0	MLB_right_40	MLB_right_80	MLB_right_120	MLB_right_160
1		80	40	90	70		-5.66	-3.25	3.07	2.33	2.36	-1.58	12.78	-4.5	-0.17	-0.34	-0.41	-0.67		-5.63	-4.83	-19.09	-21.85	-9.49	-22.43	0.78	0.69	0.4	0.7		-2.66667	-0.897727	-4.33333	-4	-10.5417	-3.90909	-7.35606	-5.70076	-1.5
2		80	90	70	70		1.12	3.09	7.13	6.49	-6.13	5.03	-8.03	5.21	0.33	0.09	0.61	0.21		-4.36	-4.2	-19.64	-10.71	-13.85	-10.22	1.16	1	0.43	0.42		-5.12121	-8.375	-0.291667	-3.95833	-1.54167	6.75	10.0417	11.1667	10.8182
3		80	40	70	55		2.96	3.78	-9.08	-3.94	42.41	-5.76	28.53	13.36	-0.39	-0.41	-0.72	-0.83		-8.44	-4.63	-47.23	-27.4	-22.87	-21.44	0.66	0.77	0.48	0.35		-9.16667	-10.75	-6.66667	-1.91667	4.41667	6.66667	12.5417	19.6667	16.25
4		90	80	90	90		-13.92	-12.32	3.93	-0.87	16.39	0.42	5.3	8.1	0.13	-0.04	0.39	-0.1		-8.89	-5.26	-23.58	-15.06	-60.21	-33.28	0.53	0.7	0.4	0.36		-22.7727	-25.1667	-14.4583	-7.625	-9.70833	-6.36364	-5.58333	-12.375	-14.2083
5		70	70	60	50		-11.57	-3.05	-7.31	-6.89	-4.03	-5.74	7.01	-1.39	0.3	0.34	0.76	0.48		-4.9	-6.19	-16.86	-6.73	-11.53	-17.99	0.28	0.36	0.1	0.36		-12.75	-15.0833	-15.4167	-12.2917	-8.58333	-3.75	2.70833	0.5	-1.20833
6		70	50	85	60		5.3	9.02	-6.34	-4.76	4.38	-5.72	12.01	14.15	-0.56	-0.29	-1.02	-0.64		-9.75	-11.91	-33.78	-16.37	-41.41	-25.28	0.69	1.08	0.75	1.36		10.0417	1.5947	7.29167	12.7083	11.3598	9.45455	8.75	-0.295455	2.82576
7		80	60	70	50		-6.47	-8.02	-11.56	-21.34	7.55	9.99	39.84	0.8	-0.13	0.08	-0.03	0.08		-9.75	-13.49	-9.59	-14.52	-35.88	-36.53	0.41	0.1	0.11	0.33		-4.76894	-6.70076	-8.375	-6.79167	-6.29167	-5.43561	-8.66667	-7.20833	-10.7917
8		80	60	80	70		9.99	9.79	-6.55	-6.66	-14.41	-9.11	-35.71	-44.65	0.17	-0.13	0.22	-0.22		-8.13	-9.8	-9.57	-11.69	-22.06	-28.33	0.5	0.53	0.49	0.33		6.58333	4.18939	0	10.6174	11.6667	14.75	14.4242	14.1477	13.125
9		80	70	90	80		-0.97	-5.09	0.98	4.48	-0.88	-6.78	5.55	11.87	0.43	0.22	0.88	0.68		-7.67	-5.85	-6.02	-7.17	-27.77	-14.54	0.11	0.3	0.4	0.32		-9.45833	-11.7917	-14.3333	-5.28409	-6.20833	0.583333	6.375	4.83333	8.27652
10		80	40	80	60		-28.93	-21.59	-2.86	-1.54	11.81	10.76	22.47	26.46	0.3	0.21	0.57	0.5		-13.62	-6.96	-8.96	-11.81	-45.84	-22.45	3.66	0.5	0.84	0.46		-24.6667	-24.75	-21.8333	-23.2917	-20.3333	-24.1364	-23.7083	-29.9583	-34.8182
11		40	40	70	60		6.46	6.27	-8.11	-6.55	0.61	-1.94	-9.58	-4.22	0.32	0.21	0.96	0.43		-6.36	-5.48	-11.39	-14.12	-26.34	-24.9	0.96	1.28	0.62	0.53		2.25	2.29167	1.98333	6.29167	9.59091	5.79167	10.6667	10.125	8.25
12		80	70	90	70		-10.92	-8.24	0.29	1.85	19.16	0.61	19.14	13.6	-0.33	-0.19	-0.87	-0.35		-4.24	-3.13	-13.11	-3.47	-16.26	-18.56	0.59	0.99	0.33	0.35		-27.7538	-25.9583	-28.0833	-12.1667	-8.25	0.916667	6.01136	5.58333	3.32197
13		50	30	70	40		-18.16	-16.03	-1.35	-0.09	8.08	5.38	8.48	11.24	-0.21	0.08	-0.26	0.3		-5.64	-8.21	-17.1	-17.87	-22.86	-26.93	0.54	0.28	0.47	0.56		-17.6667	-14.3409	-14.25	-21.875	-19.2955	-17.2273	-16.4583	-15.9167	-16.2917
14		90	40	80	40		-24.45	-13.99	2.48	-2.34	8.15	9.04	11.97	23.83	-0.3	-0.05	-0.33	-0.17		-3.66	-2.55	-19.14	-11.08	-43.3	-43.55	0.41	0.32	0.4	0.35		-21.4015	-21.125	-21.3333	-24.75	-16.8333	-18.0189	-17.2083	-16.0417	-16.3333
15		80	70	70	60		2.12	3.92	-3.44	-3.49	8.16	7.47	-0.1	2.89	-0.28	-0.09	-0.15	-0.14		-6.89	-3.71	-15.66	-12.46	-9.48	-7.24	0.33	1.47	0.33	0.33		-7.27652	-3.29167	-2.70833	-0.291667	5.29167	6.58333	9.38636	11.875	8.00833
16		70	75	90	60		-5.76	-1.86	-2.64	-3.76	-8.78	-6.41	-5.76	31.8	0.28	0.09	0.39	0.13		-3.18	-4.61	-11.59	-6.34	-19.73	-26.52	0.86	0.44	0.33	0.6		-8.04167	-4.95833	-3.28788	-4.83333	-3.75	-3.91667	-4.875	1.20833	-1.15152
17		60	80	90	80		-1.66	5.08	6.73	3.93	0.88	2.1	29.19	27.69	0.42	0	0.68	0.06		-11.27	-3.83	-13.9	-1.93	-27.96	-28.69	0.58	0.11	0.46	0.35		-2.48864	-0.5	-1.79167	-2.625	2.45833	2.83333	1.58333	5.125	10.75
18		75	65	75	60		-3.09	-7.7	1.16	0.68	1.73	-2.23	-0.53	-12.34	0.18	-0.24	0.26	-0.43		-5.38	-4.29	-22.04	-15.73	-20.32	-26.12	0.74	0.49	0.42	0.33		0.359848	-9.45833	-8.59091	-12.5417	-2.16667	-4.5	-3.20833	-1.08333	-7.29167
19		100	80	90	100		-4.47	-4.08	-0.71	-4.34	6.24	3.09	4.67	-10.48	0.04	0.38	-0.02	0.69		-4.86	-5.56	-6.98	-7.27	-16.15	-9.55	0.98	0.75	0.12	0.4		-20.5	-19.5417	-11.8371	-3.875	3.875	6.01136	4.83333	0.416667	2.25
20		70	40	80	70		-3.76	-2.7	-1.06	2.14	-0.15	-12.43	-14.92	-7.1	0.17	0.73	0.52	1.52		-6.03	-5.66	-18.04	-16.04	-35.21	-21.17	0.33	0.84	0.57	0.66		-9.10227	-11.0417	-4.81439	-8.95833	6.33333	1.75	-1.95833	-2.83333	1.3447
21		35	60	70	80		9.26	13.03	1.66	6.59	-2.43	-10.54	-32.36	-13.88	0	0.13	-0.11	0.46		-4.59	-1.62	-7.85	-7.97	-20.47	-22.24	0.32	0.33	0.28	0.09		12.3674	11.7083	11.7083	9.25	9.375	9.95833	13.3561	12.9583	9.91667
22		80	70	60	60		-22.59	-17.81	-4.06	-4	-7.65	-14.4	9.89	7.82	0.04	0.08	0.01	0.44		-12.03	-9.78	-15.46	-15.51	-31.49	-26.74	0.74	1.23	0.57	1.2		-47.7462	-55.0833	-43.875	-37.0417	-17.375	-8.91667	3.33333	8.98864	17.1932
23		70	70	80	70		1.18	6.4	-3.39	-3.35	36.64	9.45	-9.65	-26.5	0.04	-0.18	0.09	-0.63		-2.41	-4.05	-46.8	-9.91	-21.36	-23.69	0.36	0.43	0.23	0.48		-3.66667	-2.24621	-1.29167	-5.375	3.625	5.66667	14.2917	9.19318	14.2841
24		80	80	60	70		-37.79	-30.93	-17.65	-11.52	3.6	9.69	41.52	0.61	0.47	0.26	0.77	0.54		-5.13	-9.24	-12.96	-8.48	-40.34	-18.31	0.39	0.49	0.49	0.52		-49.0833	-48	-44.2917	-36.125	-33.0417	-29.0833	-25.1667	-22.4811	-20.4091
25		90	70	80	50		0.65	5.06	-2.4	-1.98	-3.39	-8.63	-5.86	9.16	-0.17	-0.17	-0.32	-0.26		-5.85	-9.81	-17.05	-13.91	-28.46	-14	0.22	0.69	0.45	0.86		1.33333	3.95833	7.33333	8.82955	-0.25	5.08333	3.72727	0.534091	-4.97348
26		100	80	100	90		5.32	-8.28	-48.3	-3.49	-7.39	9.93	-54.78	7.4	0.3	0.34	0.57	0.57		-204.2	-13.62	-32.38	-40.19	-50.33	-82.36	1.05	1.61	0.46	0.5		-11.0417	-5.96591	-7.5	0.666667	-1.79924	-1.08333	5.875	6.58333	0.916667
27		50	40	40	60		-17.47	-7.11	-4.16	-3.05	49.66	13.87	-14.14	-21.48	0.21	0.04	0.41	0.1		-15.66	-8.67	-166.2	-31.1	-41.77	-53.61	0.98	0.96	1.02	0.92		-20.0909	-13.1667	-16.5833	-3.125	-6.92045	-8.66667	-11.7803	-18.5667	-12.25
28		70	90	80	90		1.29	6.47	3.22	2.42	-5.71	-4.42	8.29	-10.7	0.08	-0.13	0.19	-0.27		-5.72	-3.88	-14.51	-10.54	-20.06	-19.95	0.56	0.62	0.52	0.32		-0.5	-0.416667	-0.375	-0.208333	5.11364	8.5	4.44318	7.50379	11.0833
29		60	30	70	70		-4.47	-6.93	1.34	5.98	-1.78	3.11	-0.46	15.96	-0.09	0.17	0.01	0.35		-4.64	-5.62	-9.45	-6.67	-5.43	-20.8	0.4	0.54	0.53	0.46		-14.1667	-19.125	-14.875	-13.0265	-6.91667	3.20833	4.58333	4.72348	4.5
30		70	50	80	70		1.68	-3.7	5.26	4.99	-2.25	1.29	15.86	-10.79	-0.44	-0.6	701.32	-10.51		-9.47	-11.88	-26.56	-12.7	-26.3	-21.53	1.282	320.3	0.5698	4.627		-5.75	-11.3902	-9.20833	-2.54167	-3.70455	1.35606	6.95833	10.7386	4.95833
31		90	80	90	80		-8.79	-9.69	-2.97	-1.09	7.35	-5.36	32.14	4.36	0.13	-0.08	0.28	-0.36		-4.05	-4.45	-14.99	-14.98	-45.5	-31.11	0.33	0.36	0.12	0.47		-21.0417	-13.15	-17.2083	-9.45833	-10.5833	-8.25	-4.58333	-0.814394	1.91667
32		70	60	60	40		-3.62	-2.73	-0.14	3.5	-1.77	-8.44	-31.96	-9.79	0	-0.04	0.02	-0.17		-4.59	-5.98	-12.69	-10.68	-43.57	-13.06	0.63	0.4	0.52	0.36		-9.18939	-11.1894	-7.5	-6.625	-1.29167	-3.33333	2.58333	2.39015	5.25
33		50	90	80	80		-15.94	-7.01	-5.23	-3.21	6.67	-5	-1.59	3.41	-0.55	0.21	-1.34	0.52		-4.25	-4.15	-15.96	-3.86	-1.54	-11.49	0.75	0.81	0.88	0.52		-16.0265	-17.5833	-20.0871	-14	-9.58333	-10.1667	-6	-4.95833	-4.98485
34		70	60	70	70		-27.34	-25.65	-21.51	-13.36	15.35	7.88	4.41	12.92	-0.09	0	-0.2	0		-13.47	-4.22	-18.46	-11.21	-22.47	-34.71	0.25	0.6	0.43	0.31		-27.2424	-25.4583	-30.2992	-27.5417	-28.375	-27.7083	-21.7727	-22.2083	-27.875
35		70	60	70	70		3.8	-4.56	-5.07	-5.42	-40.17	-20.53	9.6	5.02	0.14	0.05	0.22	0.08		-31.22	-11.08	-62.49	-59.05	-37.03	-42.15	0.56	0.22	0.76	0.11		-2.90909	2.83333	-3.08333	3.25	-7.66667	2.04167	-4.17045	10.125	-4.25
36		60	50	50	70		-2.33	-11.51	0.91	-6.38	-9.71	-5.66	29.99	9.33	-0.28	0.18	-0.43	0.33		-16.43	-20.61	-12.22	-11.83	-41.12	-38.17	0.22	0.63	0.89	0.44		-5.75	-7.16667	-6.33333	-6.26136	-12.125	-10.7917	-2.66667	-4.79167	-6.41667
37		70	70	60	60		-9.07	-3.88	-11.57	-8.92	-5.87	-3.36	-58.51	-56.88	-0.29	-0.04	-0.01	-0.19		-14.18	-9.38	-21.93	-20.96	-36.87	-46.29	1.92	0.69	0.46	0.48		-22.25	-24.5871	-9.625	-8	-9.04167	-1.25	11.4583	5.29167	0.541667
38		80	80	90	100		3.34	4.96	3.47	-0.54	10.99	23.03	3.44	18.84	-0.09	-0.51	0.02	-1.38		-6.77	-2.79	-7.7	-13.81	-40	-21.95	0.59	0.34	0.91	1.51		-10.3333	-3.33333	-1.95833	2.20833	4.20833	4.58333	9.14394	15.8667	18.7765
39		60	40	60	30		-13.54	-13.96	-14.87	-14.28	-9.82	-2.2	11.83	7.52	0.04	-0.13	0.1	-0.2		-14.67	-21.11	-39.18	-27.86	-23.32	-48.19	0.33	0.4	0.29	0.52		-22.7083	-20.8144	-16.0417	-14.9583	-12.625	-10.3333	-9.95833	-10.0417	-6.66667
40		60	50	70	70		-8.27	-6.35	-10.05	-10.68	4.72	-1.13	7.12	-9.34	0.17	0	0.64	0.39		-6.95	-8.64	-11.63	-18.23	-54.77	-43.23	0.21	1.29	0.58	0.98		4.30833	-2.16667	-4.40909	-4.29167	-11.375	-7.33333	-8.82576	-14.125	-15.8333
41		60	80	80	90		-4.23	-3.09	-1.25	-2.51	18.18	2.46	38.74	45.77	0.21	0.13	0.62	0.32		-6.92	-10.8	-33.46	-11.4	-25.38	-21.67	0.53	0.57	0.68	0.54		-8.34848	-12.1629	-11.9583	-11.8864	-2.5	4.875	7.33333	0.625	-0.0833333
42		60	25	80	35		-3.73	-5.09	-7.03	-4.25	4.08	-5	-17.14	-8.3	0.13	0.17	0.24	0.39		-4.7	-3.12	-12.1	-2.72	-25.24	-23.99	0.42	0.53	0.41	0.31		-9.45833	-13.3106	-12.8333	-9.625	-1.25	2.79167	4.22727	2.28409	-1.81439
43		100	80	80	80		0.76	6.09	-8.26	-4.03	10.4	4.52	18.1	10.93	0.26	0.34	0.37	0.46		-7.84	-4.51	-14	-12.31	-21.9	-16.49	0.22	0.46	0.23	0.4		-15.125	-15.9167	-12.375	-4.91667	6.20833	14.2917	13.0417	23.9583	21.6667
44		80	70	90	60		-15.49	-11.63	-3.09	1.13	16.99	-0.58	-8.08	-12.47	-0.25	-0.3	-0.65	-0.48		-6.89	-5.28	-37.59	-43.64	-18.84	-21.9	1.17	0.96	0.84	0.96		-17.4583	-19.8447	-19.0833	-12.5833	-14.1894	-6.96212	-7.08333	-14.5833	-10.1288
45		80	70	90	90		-2.39	5.16	-1.98	1.2	1.63	4.09	-6.37	1.61	0.17	-0.04	0.2	-0.2		-3.38	-5.87	-9.61	-14.05	-15.93	-25.1	0.12	0.44	0.4	0.1		-4.45833	-2.16667	1.20833	1.91667	0.916667	4.25	1.08333	1.85985	7.83333
46		70	60	60	40		-1.97	-2.12	-0.85	3.05	10.41	3.91	-15.62	-5.3	-0.29	-0.21	-0.72	-0.16		-3.7	-1.73	-8.89	-12.84	-22.98	-24.55	0.33	0.25	0.52	0.59		-8.25	-8.62121	-10.125	-7.61364	-2	2.54167	4.5	5.97727	5.30303
47		90	80	80	70		-1.25	0.11	-9.13	-10.19	18.2	12.16	-3.86	31.24	0.42	-0.38	1.37	-0.83		-7.02	-12.58	-33.81	-15.16	-155.8	-80.16	1.32	0.68	0.83	1.66		-13.3333	-9.32955	-9.45833	-5	-1.75	5.14773	10.7083	7.83333	10.0417
48		80	50	60	50		-20.98	-22.04	-0.79	-0.48	12.33	5	1.75	24.3	0.22	0.62	0.52	1.59		-8.43	-4.25	-9.6	-7.68	-35.74	-41.89	1.2	1.23	2.43	1.48		-23	-25.4583	-21.125	-20.5417	-12.8333	-15.625	-20.125	-25.3712	-29.9848
49		75	80	80	70		-7.64	14.95	3.69	1.21	0.3	-0.99	14.51	12.44	-0.34	0.36	0.21	0.77		-17.67	-10.79	-6.77	-7.01	-39.52	-19.63	0.39	0.48	0.39	0.28		5.5	4.33333	3.79167	-3.20833	2.77652	6.33333	3.90909	5.58333	3.83333
50		90	85	90	80		-1.65	0.05	3.25	3.87	-18.15	-8.25	-1.8	21.33	0.36	0.05	-0.2	-0.18		-7.4	-5.69	-8.42	-9.24	-46.49	-22.89	0.33	0.53	0.25	0.31		-11.4167	-8.48333	-2.125	-1.875	-7	4.875	5.125	3.54167	9.20833
